# Supplementary material for: Solution-synthesis of Sb2Se3 nanorods using KSeCN as a molecular selenium source
Source: Royal Society of Chemistry journal article supplement (doi:10.1039/c9ce01399g), 2019-11-04
Supplement: c9ce01399g1.pdf [file c9ce01399g1.pdf]

Electronic Supplementary Information (ESI)

**Solution-synthesis of  $\text{Sb}_2\text{Se}_3$  nanorods using  $\text{KSeCN}$  as a molecular selenium source**

Junli Wang<sup>\*,a</sup> and Fan Guan<sup>a</sup>

<sup>a</sup>*School of Materials Science & Engineering, Jiangsu University, Zhenjiang 212013, P. R. China.*

*\*E-mail: wangjl@ujs.edu.cn; junleewang@yahoo.com.*

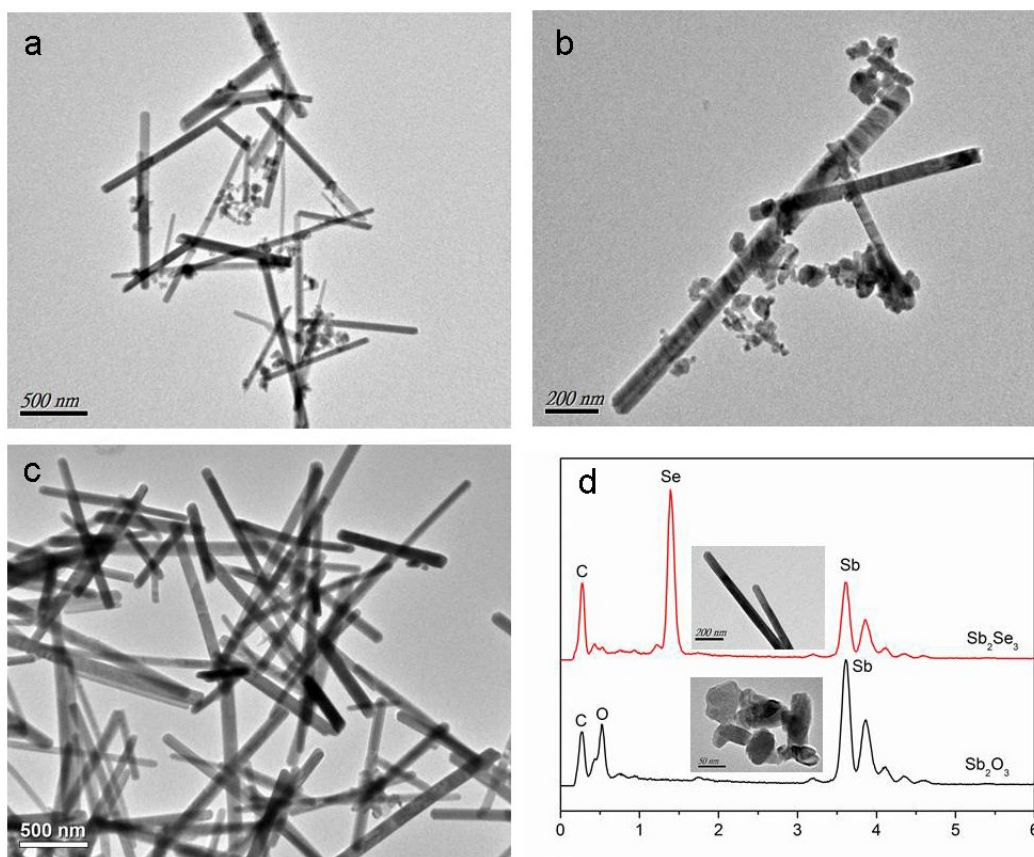

**Fig. S1** TEM images of  $\text{Sb}_2\text{Se}_3$  sample prepared using different  $\text{SbCl}_3/\text{KSeCN}$  molar ratios: (a,b) 1:1 and (c) 1:2. It can be clearly seen that 1:1  $\text{SbCl}_3/\text{KSeCN}$  produced a mixture of  $\text{Sb}_2\text{Se}_3$  NRs and  $\text{Sb}_2\text{O}_3$  nanoparticles whereas 1:2  $\text{SbCl}_3/\text{KSeCN}$  produced pure  $\text{Sb}_2\text{Se}_3$  NRs. EDS spectra shown in (d) prove their chemical compositions, which are  $\sim 2:3$  Sb/Se for  $\text{Sb}_2\text{Se}_3$  NRs and  $\sim 2:3$  Sb/O for  $\text{Sb}_2\text{O}_3$  nanoparticles, respectively.

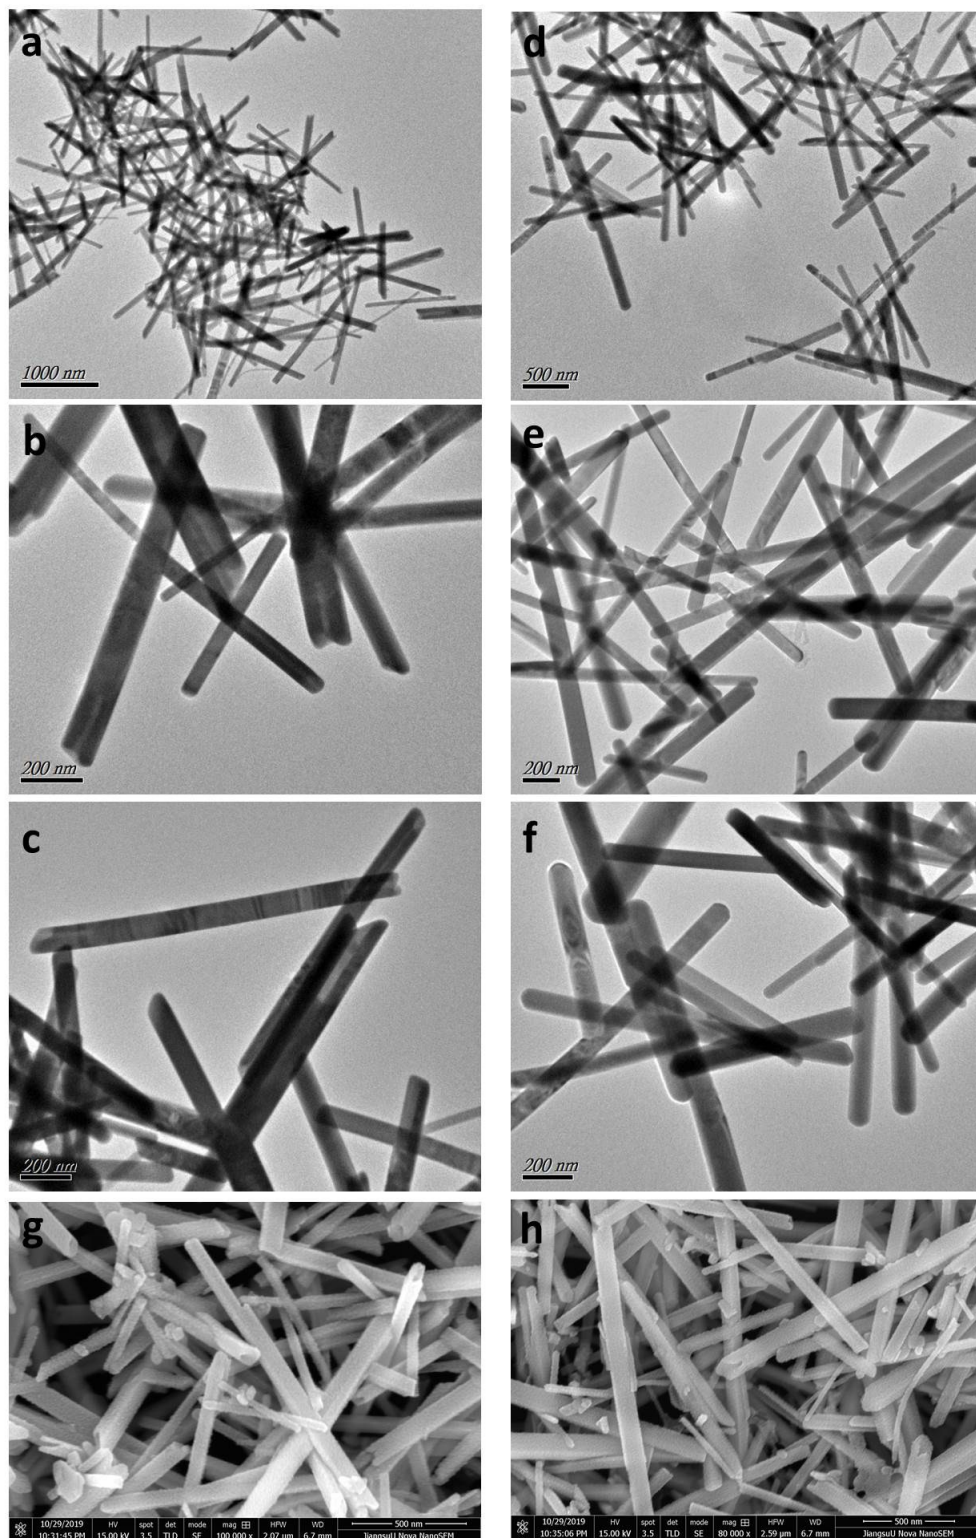

**Fig. S2** TEM and SEM images of  $\text{Sb}_2\text{Se}_3$  samples obtained at different reaction times: (a-c) TEM, 20 min; (d-f) TEM, 40 min; (g,h) SEM, 20 min.

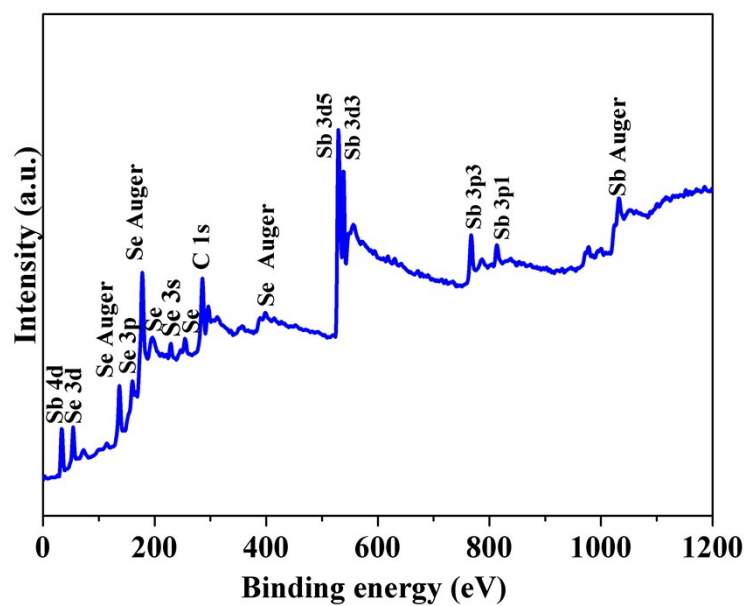

**Fig. S3** XPS survey spectrum of  $\text{Sb}_2\text{Se}_3$  nanorods prepared with the 1:2 molar ratio of  $\text{SbCl}_3/\text{KSeCN}$ .

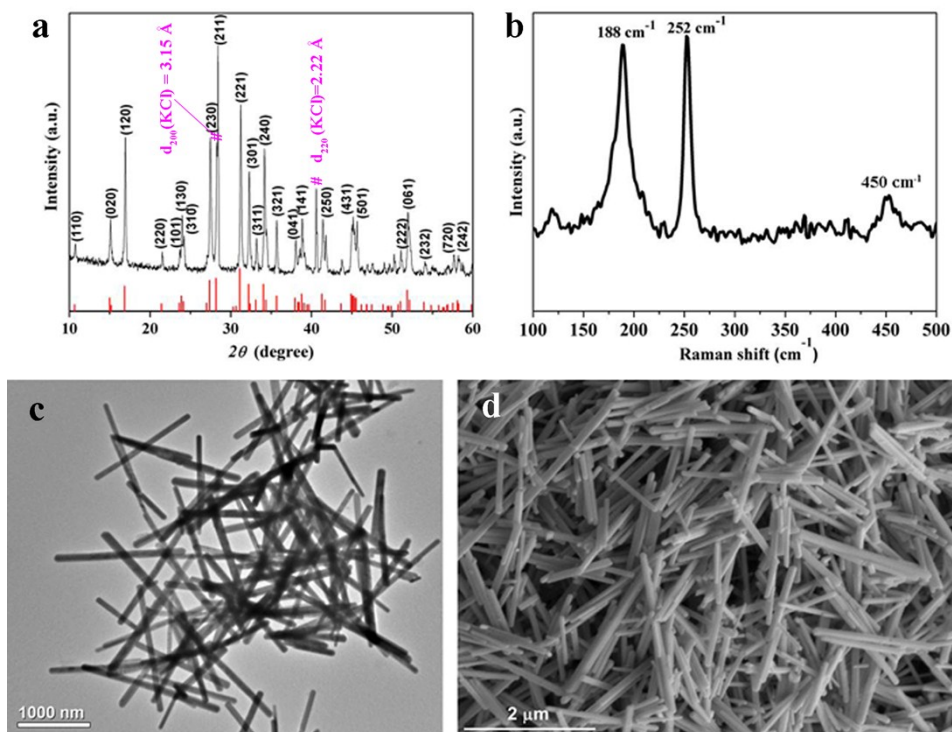

**Fig. S4** (a) XRD pattern, (b) Raman spectrum, and (c,d) TEM and SEM images of  $\text{Sb}_2\text{Se}_3$  NRs prepared with the 1:3 molar ratio of  $\text{SbCl}_3/\text{KSeCN}$ . The diffractions due to KCl are present in the XRD pattern, since the sample was not washed with ethanol/water.

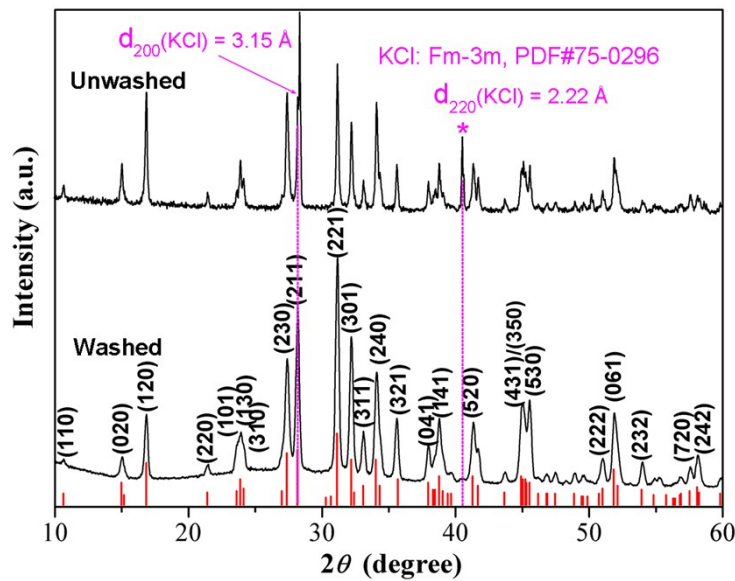

**Fig. S5** XRD patterns for the  $\text{Sb}_2\text{Se}_3$  samples (prepared at 1:2  $\text{SbCl}_3/\text{KSeCN}$ ) washed and unwashed with ethanol/water, respectively. The diffraction peaks from KCl, which is formed as a side product of **Reaction (4)** shown in the main text, are detected in the unwashed sample (Top). However, these peaks disappear after the sample is washed with ethanol/water (Bottom) because KCl is highly soluble in water.

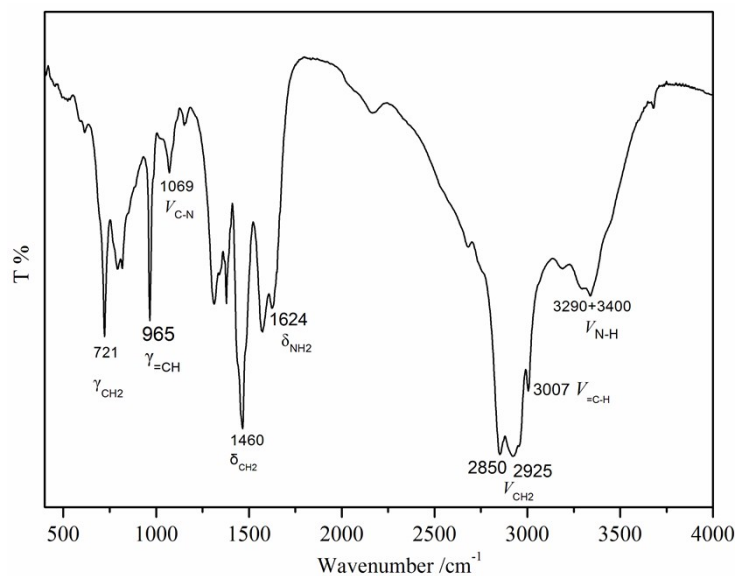

**Fig. S6** FT-IR spectrum of liquid-state reaction solution obtained after the synthesis of  $\text{Sb}_2\text{Se}_3$  nanorods at 200 °C for 1 h. The IR active vibration peaks for OLA [*cis*-9-Octadecenylamine;  $\text{CH}_3(\text{CH}_2)_7\text{CH}=\text{CH}(\text{CH}_2)_7\text{CH}_2\text{NH}_2$ ] can be clearly assigned, while the characteristic peak (often appearing at  $\sim 2190 \text{ cm}^{-1}$ ) for  $\text{C}\equiv\text{N}$  bonds is not detected.

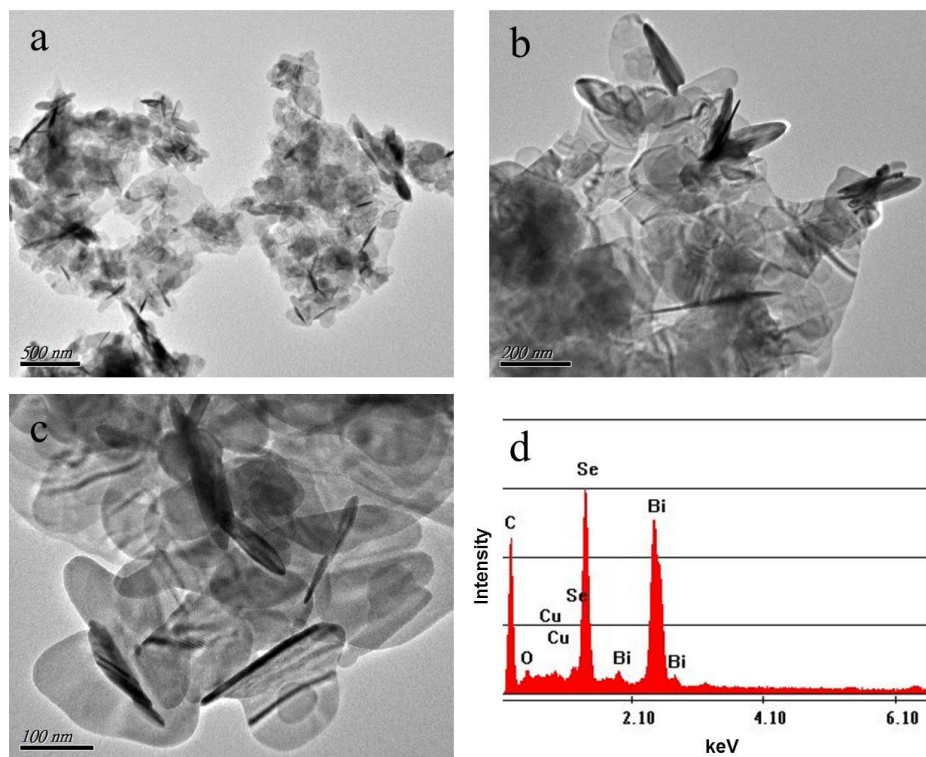

**Fig. S7** TEM and EDS results of Bi<sub>2</sub>Se<sub>3</sub> nanosheets prepared using KSeCN as a Se source (BiCl<sub>3</sub>/KSeCN = 0.5 mmol : 1 mmol; 200 °C, 1 h, 10 mL OLA).
